# Supplementary material for: Toward an Integrated Model of Capsule Regulation in Cryptococcus neoformans
Source: PLoS Pathog. 2011 Dec 8;7(12):e1002411. doi: 10.1371/journal.ppat.1002411 (PMC3234223; doi:10.1371/journal.ppat.1002411)
Supplement: Table S2 — The transcriptional signature of capsule. Genes found to be significantly correlated with capsule size over panel of in vitro conditions are ordered by significance according to estimated false discovery rate (FDR). (XLS) [file ppat.1002411.s003.xls]

## Sheet: Positive signature
Broad ID	Name	Array probe	Description	FDR (%)	Capsule phenotype	Source
CNAG_00191		181.m08716	conserved hypothetical protein	0
CNAG_00433		181.m08773	conserved hypothetical protein	0
CNAG_00485		181.m08220	conserved hypothetical protein	0
CNAG_00522		181.m08261	C2 domain-containing protein	0
CNAG_00638		181.m08367	GTPase	0
CNAG_00662		181.m08391	dienelactone hydrolase family protein	0
CNAG_00674		181.m08873	conserved hypothetical protein	0
CNAG_00682		181.m08407	kinesin	0
CNAG_00871		163.m04746	conserved hypothetical protein	0
CNAG_00999		163.m06595	conserved hypothetical protein	0
CNAG_01147		163.m06205	ARP2/3 complex 20 kDa subunit	0
CNAG_01387		163.m06141	conserved hypothetical protein	0
CNAG_01493		166_4.seq.202	conserved hypothetical protein	0
CNAG_01504		179.m00583	conserved hypothetical protein	0
CNAG_01584		179.m00094	hydrolase	0
CNAG_01604		179.m00651	haloacid dehalogenase-like hydrolase domain-containing protein 2	0
CNAG_01702		179.m00195	integral membrane protein	0
CNAG_01732		179.m00217	NPL4	0
CNAG_01945		176.m02418	conserved hypothetical protein	0
CNAG_02179		167.m03504	hemolysin	0
CNAG_02849		179.m00398	glutathione transferase	0
CNAG_02966		179.m00504	carboxypeptidase D	0
CNAG_03002		179.m00528	conserved hypothetical protein	0
CNAG_03140		177.m03266	sugar transporter	0
CNAG_03153		177.m03253	sec14 cytosolic factor	0
CNAG_03179		177.m03227	conserved hypothetical protein	0
CNAG_03187		177.m03219	protoporphyrinogen oxidase	0
CNAG_03402		177.m03031	conserved hypothetical protein	0
CNAG_03415		177.m03383	conserved hypothetical protein	0
CNAG_03667		186.m04036	conserved hypothetical protein	0
CNAG_03719		186.m03646	conserved hypothetical protein	0
CNAG_03794		186.m04052	endoplasmic reticulum protein	0
CNAG_03873		186.m03805	conserved hypothetical protein	0
CNAG_03881		186.m04108	conserved hypothetical protein	0
CNAG_03910		186.m03836	D-xylose-proton symporter	0
CNAG_03950		186.m03874	transcription elongation factor SPT6	0
CNAG_04587		185.m02731	conserved hypothetical protein	0
CNAG_04767		185.m02540	conserved hypothetical protein	0
CNAG_04878		185.m02661	conserved hypothetical protein	0
CNAG_04944		184.m04983	conserved hypothetical protein	0
CNAG_05057		173_1.seq.187	conserved hypothetical protein	0
CNAG_05060		184.m04878	conserved hypothetical protein	0
CNAG_05079		173_1.seq.162	predicted protein	0
CNAG_05081	PDE1	184.m04860	phosphodiesterase	0	hyper	Hicks et al, 2005
CNAG_05297		184.m04669	conserved hypothetical protein	0
CNAG_05306		184.m04660	conserved hypothetical protein	0
CNAG_05309		184.m04658	conserved hypothetical protein	0
CNAG_05313		184.m04653	conserved hypothetical protein	0
CNAG_05419		184.m04406	conserved hypothetical protein	0
CNAG_05774		180.m02978	conserved hypothetical protein	0
CNAG_05862		180.m00053	mating-type switching protein swi10	0
CNAG_05930		180.m00024	conserved hypothetical protein	0
CNAG_05931		180.m00269	basic amino acid transporter	0
CNAG_05994		164.m01646	multidrug transporter	0
CNAG_06075		164.m02090	conserved hypothetical protein	0
CNAG_06220		164.m02173	allergen	0
CNAG_06504		183.m01901	conserved hypothetical protein	0
CNAG_06576		180.m00212	allergen	0
CNAG_06577		180.m00211	conserved hypothetical protein	0
CNAG_06598		168_3.seq.081	predicted protein	0
CNAG_06668		180.m00165	mitochondrial protein	0
CNAG_06828		163.m06377	vacuolar amino acid transporter 3	0
CNAG_06867		167.m05810	conserved hypothetical protein	0
CNAG_07319		181.m07963	conserved hypothetical protein	0
CNAG_07470	PDE2	186.m03536	high-affinity phosphodiesterase	0	hyper	Hicks et al, 2005
CNAG_07695		180.m00017	gamma-aminobutyric acid transporter	0
CNAG_07941		183.m01829	conserved hypothetical protein	0
CNAG_00563		181.m08301	conserved hypothetical protein	0.15872
CNAG_00794		170_5.seq.040	conserved hypothetical protein	0.15872
CNAG_01626	ADA2	179.m00127	transcription coactivator	0.15872	hypo	this work
CNAG_02070		167.m03605	conserved hypothetical protein	0.15872
CNAG_02398		167.m03311	conserved hypothetical protein	0.15872
CNAG_02444		167.m03269	UPF0103 protein	0.15872
CNAG_03142		177.m03265	conserved hypothetical protein	0.15872
CNAG_04322		162.m02805	conserved hypothetical protein	0.15872
CNAG_04621		185.m02404	glycogen synthase	0.15872
CNAG_05700		180.m00374	endoplasmic reticulum protein	0.15872
CNAG_05913		180.m00032	alpha-glucosidase	0.15872
CNAG_06252		164.m02193	conserved hypothetical protein	0.15872
CNAG_06473		183.m01756	conserved hypothetical protein	0.15872
CNAG_06566		180.m00471	DUF89 domain-containing protein	0.15872
CNAG_07375		181.m08358	guanyl-nucleotide exchange factor	0.15872
CNAG_07680	HAP5	180.m00044	HapE	0.15872	hypo	Jung et al, 2010
CNAG_01389		163.m04821	conserved hypothetical protein	0.254187
CNAG_01691		166_2.seq.022	conserved hypothetical protein	0.254187
CNAG_01701		179.m00194	integral membrane protein	0.254187
CNAG_01742		179.m00225	water channel	0.254187
CNAG_01861		176.m02339	conserved hypothetical protein	0.254187
CNAG_02314		167.m05919	conserved hypothetical protein	0.254187
CNAG_03146		177.m03261	alpha-amylase	0.254187
CNAG_03268		177_2.seq.142	hypothetical protein	0.254187
CNAG_03792		186.m03714	tRNA adenylyltransferase	0.254187
CNAG_04906		185.m02684	ATPase	0.254187
CNAG_05039		184.m04894	conserved hypothetical protein	0.254187
CNAG_05292		184.m05021	alpha,alpha-trehalose-phosphate synthase	0.254187
CNAG_06064		164.m01563	conserved hypothetical protein	0.254187
CNAG_06168		164.m02153	formaldehyde dehydrogenase	0.254187
CNAG_06382		183.m01881	beta-transducin repeat containing	0.254187
CNAG_06868		167.m03658	enolase 1	0.254187
CNAG_07376		181.m08359	conserved hypothetical protein	0.254187
CNAG_00074		181.m08688	integral to plasma membrane protein	0.314063
CNAG_00178		181.m07940	MUS42	0.314063
CNAG_00363		181.m08756	two-component sensor molecule	0.314063
CNAG_00464		181.m08199	pre-mRNA-splicing factor RSE1	0.314063
CNAG_00577		181.m08315	conserved hypothetical protein	0.314063
CNAG_00732		181.m08641	conserved hypothetical protein	0.314063
CNAG_01681		179.m00176	cytosine permease	0.314063
CNAG_01823		179.m00278	myo-inositol monophosphatase	0.314063
CNAG_02120		167.m03557	mitochondrial protein	0.314063
CNAG_02129		167.m03549	conserved hypothetical protein	0.314063
CNAG_03241		177.m03171	conserved hypothetical protein	0.314063
CNAG_03826		186.m03750	histone acetyltransferase ESA1	0.314063
CNAG_04275		162.m03602	metalloendopeptidase	0.314063
CNAG_04304		162.m02785	complex protein 1	0.314063
CNAG_04314		162.m04543	NAD+ kinase	0.314063
CNAG_04753		185.m02528	lactonohydrolase	0.314063
CNAG_05364		184.m04354	conserved hypothetical protein	0.314063
CNAG_05697		180.m00378	conserved hypothetical protein	0.314063
CNAG_06300		183.m01615	glutamate-cysteine ligase	0.314063
CNAG_06497		183.m01795	microsomal epoxide hydrolase	0.314063
CNAG_07551		176.m02260	conserved hypothetical protein	0.314063
CNAG_07612		176.m02363	conserved hypothetical protein	0.314063
CNAG_00389		181.m08136	mitochondrial protein	0.593833
CNAG_00627		181.m08356	specific transcriptional repressor	0.593833
CNAG_00759		181.m08478	conserved hypothetical protein	0.593833
CNAG_01052		163.m03881	conserved hypothetical protein	0.593833
CNAG_01156		163.m02736	CAP2p	0.593833
CNAG_01384		163.m06143	bodown198	0.593833
CNAG_01417		163.m06327	conserved hypothetical protein	0.593833
CNAG_01558		179.m00539	zinc-binding dehydrogenase	0.593833
CNAG_01631		179.m00132	mRNA (guanine-N7-)-methyltransferase	0.593833
CNAG_01751		179.m00232	conserved hypothetical protein	0.593833
CNAG_02041		167.m03628	conserved hypothetical protein	0.593833
CNAG_02173		167.m05863	transport protein particle component	0.593833
CNAG_02753		179.m00329	endoplasmic reticulum protein	0.593833
CNAG_02774		179.m00700	conserved hypothetical protein	0.593833
CNAG_04436		162.m02977	conserved hypothetical protein	0.593833
CNAG_04896		185.m02674	tyrosine-tRNA ligase	0.593833
CNAG_05012		184.m05204	conserved hypothetical protein	0.593833
CNAG_05138		184.m05026	exo-beta-1,3-glucanase	0.593833
CNAG_05336		184.m04326	glucose transporter	0.593833
CNAG_05593		174_1.seq.153	conserved hypothetical protein	0.593833
CNAG_05977		180.m00255	membrane protein	0.593833
CNAG_06423		183.m01715	conserved hypothetical protein	0.593833
CNAG_07411		163.m06392	RUM1	0.593833
CNAG_07696		168_1.seq.041	conserved hypothetical protein	0.593833
CNAG_00192		181.m08718	conserved hypothetical protein	1.14136
CNAG_00371		181.m08088	enoyl-CoA hydratase	1.14136
CNAG_01234		163.m06421	spore wall assembly-related protein	1.14136
CNAG_01307		163.m06493	endoplasmic reticulum protein	1.14136
CNAG_01485		179.m00627	D-lactate dehydrogenase cytochrome oxidoreductase protein	1.14136
CNAG_01521		179.m00636	metallo-beta-lactamase superfamily protein	1.14136
CNAG_01538		179.m00738	conserved hypothetical protein	1.14136
CNAG_01654	CAS34	179.m00655	Cas34p	1.14136	GXM defect	Moyrand et al, 2007
CNAG_01683		179.m00178	monosaccharide transporter	1.14136
CNAG_02006		176.m02491	deamidase	1.14136
CNAG_02133		167.m03545	6-phosphogluconolactonase	1.14136
CNAG_02335		167.m03694	UPF0364 protein	1.14136
CNAG_02447		167.m03267	conserved hypothetical protein	1.14136
CNAG_02768		166_3.seq.072	conserved hypothetical protein	1.14136
CNAG_02967		179.m00505	conserved hypothetical protein	1.14136
CNAG_03048		179.m00039	cytoplasmic protein	1.14136
CNAG_03213		177.m03200	UV-endonuclease UVE-1	1.14136
CNAG_03425		177.m03010	conserved hypothetical protein	1.14136
CNAG_03484		177.m02958	conserved hypothetical protein	1.14136
CNAG_03565		177.m02890	hydrogen-exporting ATPase	1.14136
CNAG_03609		186.m03531	conserved hypothetical protein	1.14136
CNAG_03685		186.m03606	conserved hypothetical protein	1.14136
CNAG_03765		186.m03684	trehalose-phosphatase	1.14136
CNAG_03865		186.m03798	cytoplasmic protein	1.14136
CNAG_03872		171_3.seq.027	conserved hypothetical protein	1.14136
CNAG_04023		186.m03949	conserved hypothetical protein	1.14136
CNAG_04131		162.m02827	translation repressor	1.14136
CNAG_04191		162.m02901	other/Scy1 protein kinase	1.14136
CNAG_04225		162.m03579	DUF1479 domain-containing protein	1.14136
CNAG_04295		162.m02789	conserved hypothetical protein	1.14136
CNAG_04380		162.m02724	peptidase	1.14136
CNAG_04523		162.m02964	glyceraldehyde 3-phosphate dehydrogenase	1.14136
CNAG_04725		185.m02741	conserved hypothetical protein	1.14136
CNAG_05662		184.m04632	sugar transporter	1.14136
CNAG_05791		180.m00088	conserved hypothetical protein	1.14136
CNAG_06276		183.m01592	conserved hypothetical protein	1.14136
CNAG_06602		185.m02345	cysteine-type peptidase	1.14136
CNAG_06832		163.m06376	glucosidase	1.14136
CNAG_06925		176.m02141	arsenite transporter	1.14136
CNAG_07591		179.m00573	mitochondrial metalloendopeptidase OMA1	1.14136
CNAG_00075		181.m07844	conserved hypothetical protein	1.98304
CNAG_00395		181.m08764	conserved hypothetical protein	1.98304
CNAG_00503		181.m08239	conserved hypothetical protein	1.98304
CNAG_00770		181.m08489	DNA mismatch repair protein MSH2	1.98304
CNAG_01063		163.m06173	WD-repeat protein mip1	1.98304
CNAG_01083		163.m06165	26S proteasome non-ATPase regulatory subunit 12	1.98304
CNAG_01095		163.m06121	BEM46 family protein	1.98304
CNAG_01214		163.m06429	alpha-1,6-mannosyltransferase	1.98304
CNAG_01412		163.m06330	nuclear elongation and deformation protein 1	1.98304
CNAG_01602		179.m00107	IQ calmodulin-binding domain-containing protein	1.98304
CNAG_01686		179.m00179	ThiJ/PfpI	1.98304
CNAG_02205		167.m03480	pH-response regulator protein palC	1.98304
CNAG_02360		167.m03341	conserved hypothetical protein	1.98304
CNAG_02374		167.m05937	conserved hypothetical protein	1.98304
CNAG_02522		167.m05783	carrier	1.98304
CNAG_02549		167.m03169	conserved hypothetical protein	1.98304
CNAG_02996		179.m00729	flavoprotein oxygenase	1.98304
CNAG_03003		179.m00529	conserved hypothetical protein	1.98304
CNAG_03154		177_3.seq.060	conserved hypothetical protein	1.98304
CNAG_03279		177_2.seq.124	conserved hypothetical protein	1.98304
CNAG_03433		177.m03002	endo alpha-1,4 polygalactosaminidase precusor	1.98304
CNAG_03550		177.m03475	conserved hypothetical protein	1.98304
CNAG_04040		186.m03970	AGC/RSK protein kinase	1.98304
CNAG_04293		162.m02793	vacuolar protein sorting 41	1.98304
CNAG_04403		162.m04524	CCCH zinc finger protein	1.98304
CNAG_04907		185.m02768	conserved hypothetical protein	1.98304
CNAG_04938		184.m04989	conserved hypothetical protein	1.98304
CNAG_05286		174_1.seq.028	conserved hypothetical protein	1.98304
CNAG_05388		184.m04998	DNA glycosylase	1.98304
CNAG_05607		184.m04584	cytoplasmic protein	1.98304
CNAG_05660		184.m04630	conserved hypothetical protein	1.98304
CNAG_05739		180.m02983	conserved hypothetical protein	1.98304
CNAG_05749		180.m00105	conserved hypothetical protein	1.98304
CNAG_06074		164.m02091	cytoplasmic protein	1.98304
CNAG_06107		164.m02077	WD-repeat protein pop3	1.98304
CNAG_06201		164.m02157	conserved hypothetical protein	1.98304
CNAG_06214		164_2.seq.052	predicted protein	1.98304
CNAG_06316		183.m01625	glycine dehydrogenase	1.98304
CNAG_06671		180.m00161	TKL-group protein kinase	1.98304
CNAG_06962		179.m00009	conserved hypothetical protein	1.98304
CNAG_07032		184.m04336	conserved hypothetical protein	1.98304
CNAG_07408		163.m06354	STE/STE20/PAKA protein kinase	1.98304
CNAG_07441		163.m02820	conserved hypothetical protein	1.98304
CNAG_00606		181.m08802	conserved hypothetical protein	3.00619
CNAG_00658		181.m08386	conserved hypothetical protein	3.00619
CNAG_00667		181.m08820	conserved hypothetical protein	3.00619
CNAG_00747		181.m08467	succinate-CoA ligase	3.00619
CNAG_00800		181.m08520	nicotinamidase	3.00619
CNAG_00893		163.m03785	conserved hypothetical protein	3.00619
CNAG_00904		163.m03822	aflatoxin efflux pump AFLT	3.00619
CNAG_01102		163.m06124	oxidoreductase	3.00619
CNAG_01212		163.m06555	conserved hypothetical protein	3.00619
CNAG_01294		163.m06498	inositol-pentakisphosphate 2-kinase (Ins(1,3,4,5,6)P5 2-kinase)	3.00619
CNAG_01429		163.m06303	conserved hypothetical protein	3.00619
CNAG_01463		166_5.seq.028	conserved hypothetical protein	3.00619
CNAG_01465		179.m00619	5' flap endonuclease	3.00619
CNAG_01621		179.m00123	conserved hypothetical protein	3.00619
CNAG_01668		179.m00654	conserved hypothetical protein	3.00619
CNAG_01690		179.m00183	MFS transporter	3.00619
CNAG_01868		176.m02346	RNA polymerase II elongator complex subunit	3.00619
CNAG_01895		176.m02371	conserved hypothetical protein	3.00619
CNAG_01946		176.m02419	allantoate permease	3.00619
CNAG_02013		176.m02565	conserved hypothetical protein	3.00619
CNAG_02035		167.m03634	triose-phosphate isomerase	3.00619
CNAG_02102		167.m03573	conserved hypothetical protein	3.00619
CNAG_02282		167.m05906	carboxypeptidase A4	3.00619
CNAG_02593		176.m02506	conserved hypothetical protein	3.00619
CNAG_02673		176.m02299	NAD dependent epimerase/dehydratase family protein	3.00619
CNAG_02759		179.m00334	conserved hypothetical protein	3.00619
CNAG_03511		177.m02932	conserved hypothetical protein	3.00619
CNAG_03555		177.m02899	acylglycerone-phosphate reductase	3.00619
CNAG_03578		177.m03364	conserved hypothetical protein	3.00619
CNAG_03824		186.m03749	phosphate transport protein MIR1	3.00619
CNAG_03859		186.m03791	transcriptional regulator Medusa	3.00619
CNAG_04196		162.m02873	actin binding protein	3.00619
CNAG_04227		162.m03577	conserved hypothetical protein	3.00619
CNAG_04595		185.m02379	conserved hypothetical protein	3.00619
CNAG_04864	CIR1	185.m02648	iron regulator 1	3.00619	hypo	Jung et al, 2006
CNAG_04888		185.m02666	conserved hypothetical protein	3.00619
CNAG_04925		164_2.seq.101	nuclear protein	3.00619
CNAG_05005		184.m04924	other/ULK protein kinase	3.00619
CNAG_05181		184.m04773	white collar 1 protein	3.00619
CNAG_05600		184.m04578	indigoidine synthase A family protein	3.00619
CNAG_05896		180.m00276	Uba2	3.00619
CNAG_05993		164.m02007	transmembrane transporter Liz1p	3.00619
CNAG_06165		164.m02155	sterility protein Ste20	3.00619
CNAG_06286		175_2.seq.051	conserved hypothetical protein	3.00619
CNAG_06622		180.m00440	conserved hypothetical protein	3.00619
CNAG_07338		181.m07983	N-acyl-phosphatidylethanolamine-hydrolyzing phospholipase D	3.00619
CNAG_07361		181.m08212	conserved hypothetical protein	3.00619
CNAG_07572		176.m02236	pol II transcription elongation factor	3.00619
CNAG_07647		167.m03523	voltage-gated chloride channel	3.00619
CNAG_07939		175_1.seq.098	predicted protein	3.00619
CNAG_00148		181.m07913	conserved hypothetical protein	4.88104
CNAG_00315		181.m08056	HHE domain-containing protein	4.88104
CNAG_00901		163.m04752	conserved hypothetical protein	4.88104
CNAG_01038		163.m03854	conserved hypothetical protein	4.88104
CNAG_01040		163.m03804	carboxypeptidase D	4.88104
CNAG_01293		163.m02595	conserved hypothetical protein	4.88104
CNAG_01344		163.m06521	conserved hypothetical protein	4.88104
CNAG_01837		179.m00288	vacuolar protein sorting-associated protein VPS35	4.88104
CNAG_02067		167.m03608	vacuolar protein	4.88104
CNAG_02108		167.m05843	GTPase activating protein	4.88104
CNAG_02313		167.m05973	conserved hypothetical protein	4.88104
CNAG_02427		167.m05955	conserved hypothetical protein	4.88104
CNAG_02585		176.m02216	RfeF	4.88104
CNAG_02655		176.m02284	conserved hypothetical protein	4.88104
CNAG_02702	GEF1	176.m02329	voltage-gated chloride channel	4.88104	hypo	Zhu and Williamson, 2003
CNAG_02848		179.m00397	conserved hypothetical protein	4.88104
CNAG_02907		179.m00444	tRNA (guanine-N(1)-)-methyltransferase	4.88104
CNAG_02942		179.m00480	conserved hypothetical protein	4.88104
CNAG_02989		179.m00734	PX domain-containing protein	4.88104
CNAG_03075		179.m00016	conserved hypothetical protein	4.88104
CNAG_03232		177.m03181	Lactamase_B	4.88104
CNAG_03262		177.m03412	inositol-1(or 4)-monophosphatase	4.88104
CNAG_03684		186.m03605	ATP-binding cassette transporter	4.88104
CNAG_03849		186.m03774	nuclear protein	4.88104
CNAG_03876		186.m03808	RHEB small monomeric GTPase	4.88104
CNAG_04027		186.m04083	conserved hypothetical protein	4.88104
CNAG_04797		185.m02570	signal recognition particle protein	4.88104
CNAG_05838		180.m00299	GTPase activating protein	4.88104
CNAG_06012		164.m02002	NADH-cytochrome b5 reductase	4.88104
CNAG_06109		164.m02074	conserved hypothetical protein	4.88104
CNAG_06190		164.m02144	N-acetylglucosamine-6-phosphate deacetylase	4.88104
CNAG_06279		183.m01599	nuclear localization sequence binding protein	4.88104
CNAG_06632		180.m02952	atypical/ABC1/ABC1-B protein kinase	4.88104
CNAG_06902		176.m02163	conserved hypothetical protein	4.88104
CNAG_06929		176_1.seq.001	ras GTPase-activating protein	4.88104
CNAG_07520		179.m00383	endopeptidase	4.88104
CNAG_07775		162.m02524	conserved hypothetical protein	4.88104

## Sheet: Negative signature
Broad ID	Name	Array probe	Description	FDR (%)	Capsule phenotype	Source
CNAG_00019		181.m08677	chaperone	0	unknown
CNAG_00233		181.m07988	chaperone protein	0	unknown
CNAG_00252		181.m08002	transcriptional elongation regulator	0	unknown
CNAG_00271		181.m08021	nuclear protein	0	unknown
CNAG_00304		170_2.seq.106	predicted protein	0	unknown
CNAG_00402		181.m08148	eukaryotic initiation factor 4F subunit P130	0	unknown
CNAG_00408		181.m08766	ser/Thr protein phosphatase	0	unknown
CNAG_00437		181.m08778	ubiquitin-protein ligase	0	unknown
CNAG_00532		181.m08272	conserved hypothetical protein	0	unknown
CNAG_00557		181.m08296	conserved hypothetical protein	0	unknown
CNAG_00576		181.m08314	mitochondrial protein	0	unknown
CNAG_00580		181.m08316	GTPase	0	unknown
CNAG_00743		181.m08464	imidazoleglycerol phosphate synthase	0	unknown
CNAG_00774		181.m08493	d-3-phosphoglycerate dehydrogenase 2	0	unknown
CNAG_00776		181.m08495	immunoreactive mannoprotein MP88	0	unknown
CNAG_00786		181.m08862	conserved hypothetical protein	0	unknown
CNAG_00829		181.m08551	ubiquitin-protein ligase	0	unknown
CNAG_01050		163.m04808	conserved hypothetical protein	0	unknown
CNAG_01110		163_2.seq.053	co-chaperone	0	unknown
CNAG_01119		163.m06181	peptide transporter	0	unknown
CNAG_01141		163.m02754	3'-5'-exoribonuclease	0	unknown
CNAG_01442		163.m06336	cysteine desulfhydrase	0	unknown
CNAG_01528		179.m05169	conserved hypothetical protein	0	unknown
CNAG_01577		179.m00088	glutamate dehydrogenase	0	unknown
CNAG_01592		179.m00100	protein-S-isoprenylcysteine O-methyltransferase	0	unknown
CNAG_01600		179.m00646	glutamate-rich WD repeat containing 1	0	unknown
CNAG_01871		176.m02349	membrane glycoprotein spo14	0	unknown
CNAG_01939		176.m02409	fmHP	0	unknown
CNAG_01974		176.m02440	50s ribosomal protein l36	0	unknown
CNAG_02025		167.m03642	conserved hypothetical protein	0	unknown
CNAG_02078		167.m03597	hydrolase	0	unknown
CNAG_02136		167.m03542	conserved hypothetical protein	0	unknown
CNAG_02190		167.m03494	conserved hypothetical protein	0	unknown
CNAG_02412		167.m03299	rRNA-processing protein CGR1	0	unknown
CNAG_02455		167.m03260	choline transporter	0	unknown
CNAG_02486		167.m05961	translation initiation factor	0	unknown
CNAG_02496		167.m03221	conserved hypothetical protein	0	unknown
CNAG_02506		167.m03212	3,4 dihydroxy-2-butanone-4-phosphate synthase	0	unknown
CNAG_02664		176.m02293	D-lactate dehydrogenase	0	unknown
CNAG_02709		176.m02537	mitochondrial ribosomal protein s19	0	unknown
CNAG_02858		179.m00405	adenylosuccinate synthase	0	unknown
CNAG_02870		179.m00417	tetrahydrofolylpolyglutamate synthase	0	unknown
CNAG_02895		179.m00434	dynamin GTPase	0	unknown
CNAG_02896		179.m00435	hydroxymethylglutaryl-CoA synthase	0	unknown
CNAG_02906		179.m00443	ubiquitin-conjugating enzyme e2-24 kda	0	unknown
CNAG_02914		179.m00452	conserved hypothetical protein	0	unknown
CNAG_02959		179.m00500	high-affinity iron permease CaFTR1	0	unknown
CNAG_02988		179.m00735	acetyltransferase	0	unknown
CNAG_03009		179.m00534	conserved hypothetical protein	0	unknown
CNAG_03038		179.m00046	conserved hypothetical protein	0	unknown
CNAG_03049		179.m00038	predicted protein	0	unknown
CNAG_03144		177.m03263	protein-methionine-S-oxide reductase	0	unknown
CNAG_03270		177.m03145	adenylosuccinate lyase	0	unknown
CNAG_03606		186.m03527	EF Tu/GTP binding protein	0	unknown
CNAG_03646		186.m03571	5-proFAR isomerase	0	unknown
CNAG_03720		186.m03647	hydrolase	0	unknown
CNAG_03725		186.m03652	NAD dependent epimerase/dehydratase family protein	0	unknown
CNAG_03782		186.m03703	conserved hypothetical protein	0	unknown
CNAG_03793		186.m03715	mitochondrial 40s ribosomal protein	0	unknown
CNAG_04046		186.m03975	conserved hypothetical protein	0	unknown
CNAG_04077		171_4.seq.029	hypothetical protein	0	unknown
CNAG_04169		162.m02867	conserved hypothetical protein	0	unknown
CNAG_04204		162.m02897	transcription initiation protein spt4	0	unknown
CNAG_04296		162.m02308	conserved hypothetical protein	0	unknown
CNAG_04328		162.m02774	ubiquitin-conjugating enzyme e2-18 kda	0	unknown
CNAG_04416		162.m02692	major facilitator superfamily transporter	0	unknown
CNAG_04452		162.m02673	30S ribosomal protein S18	0	unknown
CNAG_04633		185.m02416	conserved hypothetical protein	0	unknown
CNAG_04634		185.m02417	conserved hypothetical protein	0	unknown
CNAG_04739		185.m02513	metal ion transporter	0	unknown
CNAG_04810		185.m02581	conserved hypothetical protein	0	unknown
CNAG_04867		185.m02650	vacuolar protein	0	unknown
CNAG_04908		185.m02685	conserved hypothetical protein	0	unknown
CNAG_05055		184.m05176	C2H2 finger domain containing protein	0	unknown
CNAG_05162		184.m04789	predicted subunit of the V-ATPase	0	unknown
CNAG_05320		184.m04646	oxidoreductase family protein	0	unknown
CNAG_05321		184.m05039	transposase subfamily	0	unknown
CNAG_05480		184.m05044	hexokinase	0	unknown
CNAG_05550		184.m05009	conserved hypothetical protein	0	unknown
CNAG_05584		184.m04561	cytoplasmic protein	0	unknown
CNAG_05596		184.m04574	nuclear transport factor 2	0	unknown
CNAG_05626		184.m04603	h-sco1	0	unknown
CNAG_05844		180.m00068	mitochondrial import inner membrane translocase subunit TIM8	0	unknown
CNAG_05845		180.m00302	conserved hypothetical protein	0	unknown
CNAG_05893		180.m00286	conserved hypothetical protein	0	unknown
CNAG_06009		164.m01653	cyclohydrolase	0	unknown
CNAG_06444		183.m01733	signal peptidase	0	unknown
CNAG_06561		180.m00222	allantoate transporter	0	unknown
CNAG_06882		176.m02184	conserved hypothetical protein	0	unknown
CNAG_07349		170_2.seq.100	conserved hypothetical protein	0	unknown
CNAG_07409		163.m06353	mitochondrial-related RNA polymerase	0	unknown
CNAG_07424		163_3.seq.114	predicted protein	0	unknown
CNAG_07532		176.m02278	conserved hypothetical protein	0	unknown
CNAG_07570		176.m02238	prenylated SNARE protein Ykt6p	0	unknown
CNAG_07804		184.m04889	conserved hypothetical protein	0	unknown
CNAG_01089		163.m02804	conserved hypothetical protein	0.15872	unknown
CNAG_01927		176_2.seq.109	conserved hypothetical protein	0.15872	unknown
CNAG_02189		167.m03495	alpha-amylase	0.15872	unknown
CNAG_02294		167.m03389	phosphoribosylaminoimidazole carboxylase	0.15872	unknown
CNAG_02511		167.m03208	CMGC/MAPK/ERK protein kinase	0.15872	unknown
CNAG_02750		179.m00326	conserved hypothetical protein	0.15872	unknown
CNAG_02795		179.m00692	phosphoribosylglycinamide formyltransferase	0.15872	unknown
CNAG_02798		179.m00361	conserved hypothetical protein	0.15872	unknown
CNAG_02904		166_4.seq.013	predicted protein	0.15872	unknown
CNAG_03589		177.m02871	adrenodoxin-type ferredoxin	0.15872	unknown
CNAG_03834		186.m03758	sphingosine hydroxylase	0.15872	unknown
CNAG_04037		186.m03967	conserved hypothetical protein	0.15872	unknown
CNAG_04182		162.m02236	conserved hypothetical protein	0.15872	unknown
CNAG_04704		185.m02483	carboxylic acid transport protein	0.15872	unknown
CNAG_05115		184.m05028	sarcosine oxidase	0.15872	unknown
CNAG_05675		180.m00133	mitochondrial protein	0.15872	unknown
CNAG_05711		180.m00121	conserved hypothetical protein	0.15872	unknown
CNAG_05751		180.m00103	conserved hypothetical protein	0.15872	unknown
CNAG_05823		180.m00330	conserved hypothetical protein	0.15872	unknown
CNAG_06250		164.m01361	conserved hypothetical protein	0.15872	unknown
CNAG_06614		180.m00191	glycerophosphodiesterase	0.15872	unknown
CNAG_06734		186.m03482	predicted protein	0.15872	unknown
CNAG_06866		167_1.seq.007	conserved hypothetical protein	0.15872	unknown
CNAG_07342		181.m07986	cytoplasmic protein	0.15872	unknown
CNAG_07875		184.m04385	hypothetical protein	0.15872	unknown
CNAG_00185		181.m07948	conserved hypothetical protein	0.254187	unknown
CNAG_00186		181.m07949	conserved hypothetical protein	0.254187	unknown
CNAG_00538		181.m08786	conserved hypothetical protein	0.254187	unknown
CNAG_01122		163_2.seq.066	conserved hypothetical protein	0.254187	unknown
CNAG_01215		163_2.seq.162	conserved hypothetical protein	0.254187	unknown
CNAG_01840		179.m00290	beta1-tubulin	0.254187	unknown
CNAG_02076		167.m03599	leukotriene-A4 hydrolase	0.254187	unknown
CNAG_02344		167.m03352	uracil phosphoribosyltransferase	0.254187	unknown
CNAG_02691		176.m02538	conserved hypothetical protein	0.254187	unknown
CNAG_02827		179.m00705	ribosomal chaperone	0.254187	unknown
CNAG_02955		179.m00494	conserved hypothetical protein	0.254187	unknown
CNAG_03104		177.m03296	conserved hypothetical protein	0.254187	unknown
CNAG_03318		177.m03101	conserved hypothetical protein	0.254187	unknown
CNAG_03445		177.m03384	conserved hypothetical protein	0.254187	unknown
CNAG_03733		186.m04099	conserved hypothetical protein	0.254187	unknown
CNAG_03856		186.m03785	conserved hypothetical protein	0.254187	unknown
CNAG_03898		186.m03826	phosphoadenylyl-sulfate reductase	0.254187	unknown
CNAG_04240		162.m02171	conserved hypothetical protein	0.254187	unknown
CNAG_04357		162.m04539	conserved hypothetical protein	0.254187	unknown
CNAG_04585		185.m02371	conserved hypothetical protein	0.254187	unknown
CNAG_05225		184.m04735	cell cycle control protein cwf14	0.254187	unknown
CNAG_05279		184.m04683	conserved hypothetical protein	0.254187	unknown
CNAG_05575		184.m04553	conserved hypothetical protein	0.254187	unknown
CNAG_05853		180.m00057	conserved hypothetical protein	0.254187	unknown
CNAG_05936		180.m00260	DNA-directed RNA polymerase III largest subunit	0.254187	unknown
CNAG_06067		164.m02094	conserved hypothetical protein	0.254187	unknown
CNAG_06128		164.m02105	conserved hypothetical protein	0.254187	unknown
CNAG_06291		183.m01607	deacetylase	0.254187	unknown
CNAG_06302		183.m01617	PEP2	0.254187	unknown
CNAG_06782		186.m03427	conserved hypothetical protein	0.254187	unknown
CNAG_07873		184.m04358	MIPC synthase	0.254187	unknown
CNAG_00184		181.m07947	cleavage/polyadenylation specificity factor	0.314063	unknown
CNAG_00450		181.m08189	3-isopropylmalate dehydrogenase	0.314063	unknown
CNAG_00604		181.m08336	conserved hypothetical protein	0.314063	unknown
CNAG_00669		181.m08395	conserved hypothetical protein	0.314063	unknown
CNAG_00850		181.m08571	plant-inducible protein	0.314063	unknown
CNAG_00989		163.m03887	ubiquitin-specific protease	0.314063	unknown
CNAG_01011		163.m04784	conserved hypothetical protein	0.314063	unknown
CNAG_01416		163.m06601	DUF431 domain-containing protein	0.314063	unknown
CNAG_01522		179.m00570	phenylalanyl-tRNA synthetase	0.314063	unknown
CNAG_01839		179.m00289	transcriptional elongation regulator	0.314063	unknown
CNAG_01872		176.m02539	copper ion transporter	0.314063	unknown
CNAG_01882		176.m02359	protein-lysine N-methyltransferase	0.314063	unknown
CNAG_02253		171_2.seq.137	conserved hypothetical protein	0.314063	unknown
CNAG_02579		176.m02211	conserved hypothetical protein	0.314063	unknown
CNAG_02656		176.m02285	translation machinery-associated protein 20	0.314063	unknown
CNAG_02869		166_3.seq.176	conserved hypothetical protein	0.314063	unknown
CNAG_03007		179.m00730	conserved hypothetical protein	0.314063	unknown
CNAG_03260		177.m03155	ribosomal protein L6	0.314063	unknown
CNAG_03291		177.m03124	conserved hypothetical protein	0.314063	unknown
CNAG_03373		177_2.seq.032	conserved hypothetical protein	0.314063	unknown
CNAG_03823		186.m03748	ubiquitin-protein ligase	0.314063	unknown
CNAG_03832		186.m03756	alpha-1,2-mannosyltransferase	0.314063	unknown
CNAG_04110		162.m02928	glutathione S-transferase	0.314063	unknown
CNAG_04607		174_2.seq.104	hypothetical protein	0.314063	unknown
CNAG_04665		185.m02446	conserved hypothetical protein	0.314063	unknown
CNAG_04749		185.m02523	conserved hypothetical protein	0.314063	unknown
CNAG_04983		162.m04578	conserved hypothetical protein	0.314063	unknown
CNAG_05053		184.m04883	conserved hypothetical protein	0.314063	unknown
CNAG_05278		184.m04684	hypothetical protein	0.314063	unknown
CNAG_05369		184.m04359	beta-glucosidase	0.314063	unknown
CNAG_05667		184.m04640	myo-inositol transporter 1	0.314063	unknown
CNAG_05688		180.m00399	conserved hypothetical protein	0.314063	unknown
CNAG_06436		183.m01727	conserved hypothetical protein	0.314063	unknown
CNAG_06743		186.m03474	conserved hypothetical protein	0.314063	unknown
CNAG_06864		167_3.seq.171	conserved hypothetical protein	0.314063	unknown
CNAG_07465		186.m03496	conserved hypothetical protein	0.314063	unknown
CNAG_07917		164.m02200	uracil transporter FurD	0.314063	unknown
CNAG_00025		181.m08678	calcium ion transporter	0.593833	unknown
CNAG_00118		181.m08699	conserved hypothetical protein	0.593833	unknown
CNAG_00280		181.m08028	mitochondrial Mrb1	0.593833	unknown
CNAG_00428		181.m08173	conserved hypothetical protein	0.593833	unknown
CNAG_00581		181.m08317	endopeptidase	0.593833	unknown
CNAG_00587		181.m08858	conserved hypothetical protein	0.593833	unknown
CNAG_01013		163.m03917	chromatin binding protein	0.593833	unknown
CNAG_01203		163.m06265	conserved hypothetical protein	0.593833	unknown
CNAG_01220		163.m06284	mitochondrial FAD-linked sulfhydryl oxidase ERV1	0.593833	unknown
CNAG_01230		163.m06424	chitin deacetylase 2	0.593833	unknown
CNAG_01299		163.m06481	conserved hypothetical protein	0.593833	unknown
CNAG_01439		163.m06313	U4/U6 small nuclear ribonucleoprotein Prp4	0.593833	unknown
CNAG_01598		179.m00645	conserved hypothetical protein	0.593833	unknown
CNAG_02149		167.m03532	conserved hypothetical protein	0.593833	unknown
CNAG_02220		167.m03466	conserved hypothetical protein	0.593833	unknown
CNAG_02492		167.m03225	peptidyl-prolyl cis-trans isomerase-like 3	0.593833	unknown
CNAG_03215		177.m03198	Aqr1p	0.593833	unknown
CNAG_03298		177.m03119	hypothetical protein	0.593833	unknown
CNAG_03521		177.m02925	RNA polymerase III smallest subunit	0.593833	unknown
CNAG_03557		177.m02897	transcription initiation factor iia small chain	0.593833	unknown
CNAG_03713		186.m03636	efflux protein EncT	0.593833	unknown
CNAG_03773		186.m03693	NAD binding dehydrogenase family protein	0.593833	unknown
CNAG_03787		186.m03707	alpha tubulin	0.593833	unknown
CNAG_03813		171_2.seq.158	single-stranded DNA binding protein 12k chain	0.593833	unknown
CNAG_03905		186.m03832	conserved hypothetical protein	0.593833	unknown
CNAG_03985		186.m03903	monothiol glutaredoxin-5	0.593833	unknown
CNAG_04039		186.m03969	iron sulfur cluster assembly protein 1	0.593833	unknown
CNAG_04053		186.m03981	conserved hypothetical protein	0.593833	unknown
CNAG_04197		162.m02875	CMGC/DYRK protein kinase	0.593833	unknown
CNAG_04343		162.m02749	nicotinamide mononucleotide permease	0.593833	unknown
CNAG_04503		162_1.seq.054	conserved hypothetical protein	0.593833	unknown
CNAG_04635		185.m02418	endopeptidase	0.593833	unknown
CNAG_04731		185.m02506	conserved hypothetical protein	0.593833	unknown
CNAG_04827		185.m02599	conserved hypothetical protein	0.593833	unknown
CNAG_05076		173_1.seq.165	conserved hypothetical protein	0.593833	unknown
CNAG_05247		184.m04716	1-acylglycerol-3-phosphate O-acyltransferase	0.593833	unknown
CNAG_05290		184.m04676	transcription cofactor	0.593833	unknown
CNAG_05452		184.m04434	conserved hypothetical protein	0.593833	unknown
CNAG_05586		184.m05011	conserved hypothetical protein	0.593833	unknown
CNAG_05679		180.m00397	conserved hypothetical protein	0.593833	unknown
CNAG_05887		180.m00285	pre-mRNA splicing factor	0.593833	unknown
CNAG_05979		180.m00003	phosphoglycerate dehydrogenase	0.593833	unknown
CNAG_06195		164.m01425	conserved hypothetical protein	0.593833	unknown
CNAG_06224		164.m02168	nuclear movement protein nudC	0.593833	unknown
CNAG_06259		183.m01597	alpha-glucoside:hydrogen symporter	0.593833	unknown
CNAG_07544		176.m02523	sterol esterase	0.593833	unknown
CNAG_07567		176.m02241	conserved hypothetical protein	0.593833	unknown
CNAG_07659		180.m02998	conserved hypothetical protein	0.593833	unknown
CNAG_07751		177.m02867	siderophore iron transporter mirB	0.593833	unknown
CNAG_00031		181.m08679	conserved hypothetical protein	1.14136	unknown
CNAG_00119		181.m07887	conserved hypothetical protein	1.14136	unknown
CNAG_00123		181.m08707	conserved hypothetical protein	1.14136	unknown
CNAG_00188		181.m07951	endoplasmic reticulum protein	1.14136	unknown
CNAG_00307		170_2.seq.110	predicted protein	1.14136	unknown
CNAG_00510		181.m08248	prefoldin subunit 2	1.14136	unknown
CNAG_00545		181.m08286	IDN3-B	1.14136	unknown
CNAG_00592		181.m08325	dolichol-phosphate mannosyltransferase	1.14136	unknown
CNAG_00720		181.m08442	recombinase	1.14136	unknown
CNAG_00735		181.m08456	succinate-semialdehyde dehydrogenase	1.14136	unknown
CNAG_00761		170_5.seq.006	conserved hypothetical protein	1.14136	unknown
CNAG_00781		181.m08500	conserved hypothetical protein	1.14136	unknown
CNAG_00808		181.m08527	myosin regulatory light chain cdc4	1.14136	unknown
CNAG_00930		163.m03809	argininosuccinate synthase	1.14136	unknown
CNAG_01056		163.m06545	conserved hypothetical protein	1.14136	unknown
CNAG_01151		163.m02740	conserved hypothetical protein	1.14136	unknown
CNAG_01188		163.m02700	peroxin19 Pex19p	1.14136	unknown
CNAG_01289		163_3.seq.050	conserved hypothetical protein	1.14136	unknown
CNAG_01352		163.m06516	conserved hypothetical protein	1.14136	unknown
CNAG_01380		163.m06221	conserved hypothetical protein	1.14136	unknown
CNAG_01390		163.m06139	adenine phosphoribosyltransferase	1.14136	unknown
CNAG_01455		163.m06345	RPL39p	1.14136	unknown
CNAG_01542		179.m00553	taurine catabolism dioxygenase TauD	1.14136	unknown
CNAG_01749		166_2.seq.081	conserved hypothetical protein	1.14136	unknown
CNAG_01795		179.m00261	conserved hypothetical protein	1.14136	unknown
CNAG_02002		176.m02563	conserved hypothetical protein	1.14136	unknown
CNAG_02082		167.m03593	conserved hypothetical protein	1.14136	unknown
CNAG_02084		167.m03590	farnesyl pyrophosphate synthetase	1.14136	unknown
CNAG_02090		167.m03585	guanine nucleotide-binding protein alpha-2 subunit	1.14136	unknown
CNAG_02365		167_2.seq.001	general amidase	1.14136	unknown
CNAG_02463		167.m03252	conserved hypothetical protein	1.14136	unknown
CNAG_02526		167.m05771	conserved hypothetical protein	1.14136	unknown
CNAG_02534		167.m03185	tRNA 2'-phosphotransferase	1.14136	unknown
CNAG_02545		167.m05757	inorganic diphosphatase	1.14136	unknown
CNAG_02580		176.m02212	conserved hypothetical protein	1.14136	unknown
CNAG_02740		179.m00687	conserved hypothetical protein	1.14136	unknown
CNAG_02783		179.m00349	conserved hypothetical protein	1.14136	unknown
CNAG_02890		179.m00431	conserved hypothetical protein	1.14136	unknown
CNAG_02978		179.m00727	conserved hypothetical protein	1.14136	unknown
CNAG_03263		177.m03152	translation elongation factor	1.14136	unknown
CNAG_03441		177.m02994	conserved hypothetical protein	1.14136	unknown
CNAG_03458		177.m02980	conserved hypothetical protein	1.14136	unknown
CNAG_03552		177.m02902	conserved hypothetical protein	1.14136	unknown
CNAG_03746		186.m03667	conserved hypothetical protein	1.14136	unknown
CNAG_03774		171_2.seq.109	hypothetical protein	1.14136	unknown
CNAG_03777		186.m03698	conserved hypothetical protein	1.14136	unknown
CNAG_03992		186.m03909	GTP-binding protein 1	1.14136	unknown
CNAG_04094		186.m04017	conserved hypothetical protein	1.14136	unknown
CNAG_04211		162.m02200	conserved hypothetical protein	1.14136	unknown
CNAG_04225		162_2.seq.197	DUF1479 domain-containing protein	1.14136	unknown
CNAG_04289		162.m03024	conserved hypothetical protein	1.14136	unknown
CNAG_04369		162.m02386	conserved hypothetical protein	1.14136	unknown
CNAG_04379		162.m02992	conserved hypothetical protein	1.14136	unknown
CNAG_04857		185.m02641	hypothetical protein	1.14136	unknown
CNAG_04934		180.m00426	conserved hypothetical protein	1.14136	unknown
CNAG_05424		184.m04411	conserved hypothetical protein	1.14136	unknown
CNAG_05440		184.m05073	pyridoxamine-phosphate oxidase	1.14136	unknown
CNAG_05734		180.m00110	conserved hypothetical protein	1.14136	unknown
CNAG_05769		180.m00096	cytoplasmic protein	1.14136	unknown
CNAG_05807		180.m00350	conserved hypothetical protein	1.14136	unknown
CNAG_05980		180.m00002	predicted protein	1.14136	unknown
CNAG_06174		164.m02812	other/PEK/GCN2 protein kinase	1.14136	unknown
CNAG_06235		164.m02184	conserved hypothetical protein	1.14136	unknown
CNAG_06385		183.m01878	GAF domain nucleotide-binding protein	1.14136	unknown
CNAG_06546		168_3.seq.134	conserved hypothetical protein	1.14136	unknown
CNAG_06722		186.m03494	conserved hypothetical protein	1.14136	unknown
CNAG_06968		177.m02858	hypothetical protein	1.14136	unknown
CNAG_07340		170_2.seq.028	hypothetical protein	1.14136	unknown
CNAG_07351		181.m08068	conserved hypothetical protein	1.14136	unknown
CNAG_07386		181.m08563	conserved hypothetical protein	1.14136	unknown
CNAG_07492		171_4.seq.011	conserved hypothetical protein	1.14136	unknown
CNAG_07556		176.m02573	conserved hypothetical protein	1.14136	unknown
CNAG_07564		176.m02245	conserved hypothetical protein	1.14136	unknown
CNAG_07609		179.m00284	ATP-dependent RNA helicase	1.14136	unknown
CNAG_00345		181.m08111	porphobilinogen synthase	1.98304	unknown
CNAG_00420		170_3.seq.039	conserved hypothetical protein	1.98304	unknown
CNAG_00471		181.m08206	mitochondrial protein	1.98304	unknown
CNAG_00542		181.m08783	conserved hypothetical protein	1.98304	unknown
CNAG_00562		181.m08300	conserved hypothetical protein	1.98304	unknown
CNAG_00612		181.m08343	general RNA polymerase II transcription factor	1.98304	unknown
CNAG_00708		181.m08431	pre-mRNA-splicing factor SLT11	1.98304	unknown
CNAG_00937		163.m04776	conserved hypothetical protein	1.98304	unknown
CNAG_00940		163.m06635	mitotic control protein dis3	1.98304	unknown
CNAG_01005		163.m03915	glutathione transferase	1.98304	unknown
CNAG_01131		163.m06189	conserved hypothetical protein	1.98304	unknown
CNAG_01175		163.m06246	conserved hypothetical protein	1.98304	unknown
CNAG_01221		163.m06427	prenyltransferase	1.98304	unknown
CNAG_01253		163.m06439	protein transporter	1.98304	unknown
CNAG_01321		163.m06503	acyl carrier protein	1.98304	unknown
CNAG_01334		163.m06506	conserved hypothetical protein	1.98304	unknown
CNAG_01499		179.m00634	conserved hypothetical protein	1.98304	unknown
CNAG_01510		166_4.seq.199	conserved hypothetical protein	1.98304	unknown
CNAG_01636		179.m00136	peptidyl-prolyl cis-trans isomerase-like 1	1.98304	unknown
CNAG_01676		179.m00171	eukaryotic translation initiation factor 3 62 kda subunit	1.98304	unknown
CNAG_01958		176.m02430	het-c2 protein	1.98304	unknown
CNAG_02148		167.m03533	ubiquitin-conjugating enzyme E2 13	1.98304	unknown
CNAG_02255		167.m03425	BNR/Asp-box repeat family protein	1.98304	unknown
CNAG_02354		167.m03347	ribosomal protein L2	1.98304	unknown
CNAG_02366		167.m03334	4-aminobutyrate aminotransferase	1.98304	unknown
CNAG_02367		167.m05939	GTPase	1.98304	unknown
CNAG_02372		167.m03329	conserved hypothetical protein	1.98304	unknown
CNAG_02421		167.m03291	conserved hypothetical protein	1.98304	unknown
CNAG_02503		167.m03214	glutathione peroxidase	1.98304	unknown
CNAG_02814		179.m00371	glycerol-3-phosphate dehydrogenase	1.98304	unknown
CNAG_02958		179.m00499	ferroxidase	1.98304	unknown
CNAG_03133		177.m03273	UDP-glucose,sterol transferase	1.98304	unknown
CNAG_03250		177.m03335	conserved hypothetical protein	1.98304	unknown
CNAG_03405		177.m03027	conserved hypothetical protein	1.98304	unknown
CNAG_03522		177.m02924	conserved hypothetical protein	1.98304	unknown
CNAG_04045		186.m03974	conserved hypothetical protein	1.98304	unknown
CNAG_04097		186.m04020	glucose 1-dehydrogenase	1.98304	unknown
CNAG_04142		162.m02826	tartrate transporter	1.98304	unknown
CNAG_04273		162.m04580	conserved hypothetical protein	1.98304	unknown
CNAG_04321		162.m02804	yeast chs5 homologfibronectin type III domain-containing protein	1.98304	unknown
CNAG_04408		162.m04523	choline kinase	1.98304	unknown
CNAG_04521		162.m02606	oxidoreductase	1.98304	unknown
CNAG_04798		185.m02571	regulatory protein cys-3	1.98304	unknown
CNAG_05067		184.m04871	conserved hypothetical protein	1.98304	unknown
CNAG_05196		184.m04758	20 kda nuclear cap binding protein	1.98304	unknown
CNAG_05246		184.m05137	conserved hypothetical protein	1.98304	unknown
CNAG_05377		185.m02698	myo-inositol transporter 1	1.98304	unknown
CNAG_05420		184.m04407	RNA polymerase II transcription factor	1.98304	unknown
CNAG_05470		184.m05069	ABC transporter family protein	1.98304	unknown
CNAG_05503		184.m04485	LIM domain-containing protein	1.98304	unknown
CNAG_05689		180.m00394	conserved hypothetical protein	1.98304	unknown
CNAG_05718		180.m00384	multidrug resistance protein fnx1	1.98304	unknown
CNAG_05761		180.m00363	protein kinase activator	1.98304	unknown
CNAG_05820		180.m00319	aromatic-amino-acid transaminase	1.98304	unknown
CNAG_06370		183.m01861	branched-chain-amino-acid aminotransferase	1.98304	unknown
CNAG_06656		180.m00171	diphthine synthase	1.98304	unknown
CNAG_06672		180.m00160	formate dehydrogenase	1.98304	unknown
CNAG_06811		163.m06389	RPL22	1.98304	unknown
CNAG_07365		181.m08257	oxidoreductase	1.98304	unknown
CNAG_07637		167.m03406	LSU ribosomal protein L3P	1.98304	unknown
CNAG_00049		181.m07823	conserved hypothetical protein	3.00619	unknown
CNAG_00085		181.m07854	histone chaperone ASF1	3.00619	unknown
CNAG_00151		181.m07915	peptide-binding protein	3.00619	unknown
CNAG_00157		181.m07923	conserved hypothetical protein	3.00619	unknown
CNAG_00270		181.m08020	mitochondrial protein	3.00619	unknown
CNAG_00632		181.m08361	conserved hypothetical protein	3.00619	unknown
CNAG_00645		181.m08374	diaminohydroxyphosphoribosylaminopyrimidine deaminase	3.00619	unknown
CNAG_00673		170_4.seq.091	cytoplasmic protein	3.00619	unknown
CNAG_00836		181.m08556	2-hydroxyacid dehydrogenase	3.00619	unknown
CNAG_00840		181.m08560	conserved hypothetical protein	3.00619	unknown
CNAG_00986		163.m03927	URM1 activating enzyme	3.00619	unknown
CNAG_01009		163.m04787	conserved hypothetical protein	3.00619	unknown
CNAG_01018		163.m03861	eukaryotic translation initiation factor 2 gamma	3.00619	unknown
CNAG_01076		163.m06111	4-aminobutyrate transaminase	3.00619	unknown
CNAG_01111		163.m06128	eukaryotic translation initiation factor 3 subunit 11	3.00619	unknown
CNAG_01144		163.m02748	damaged DNA binding protein	3.00619	unknown
CNAG_01291		163_3.seq.052	conserved hypothetical protein	3.00619	unknown
CNAG_01500		179.m00640	taurine dioxygenase	3.00619	unknown
CNAG_01607		179.m00111	thioredoxin	3.00619	unknown
CNAG_01843		179.m00292	elongation factor ts	3.00619	unknown
CNAG_01923		176.m02398	arsenical pump-driving ATPase	3.00619	unknown
CNAG_01964		176.m02436	oligopeptide transporter	3.00619	unknown
CNAG_02026		167_3.seq.159	conserved hypothetical protein	3.00619	unknown
CNAG_02204		167.m03481	nuclease	3.00619	unknown
CNAG_02363		167.m03337	SCR1 protein	3.00619	unknown
CNAG_02569		176.m02202	conserved hypothetical protein	3.00619	unknown
CNAG_02595		176.m02511	conserved hypothetical protein	3.00619	unknown
CNAG_02799		179.m00696	dihydroxyacetone kinase 1	3.00619	unknown
CNAG_02853		179.m00402	amidophosphoribosyltransferase	3.00619	unknown
CNAG_02913		179.m00451	conserved hypothetical protein	3.00619	unknown
CNAG_02917		179.m00454	YHM1	3.00619	unknown
CNAG_02985		179.m00518	nuclear mRNA splicing protein	3.00619	unknown
CNAG_03022		179.m00059	conserved hypothetical protein	3.00619	unknown
CNAG_03192		177.m03214	conserved hypothetical protein	3.00619	unknown
CNAG_03274		177.m03141	S-adenosylmethionine transporter	3.00619	unknown
CNAG_03531		177.m02916	3-beta hydroxysteroid dehydrogenase/isomerase	3.00619	unknown
CNAG_03651		186.m03575	t-SNARE	3.00619	unknown
CNAG_03673		186.m03596	serine/threonine-protein phosphatase PP-Z	3.00619	unknown
CNAG_03732		186.m03659	integral membrane protein	3.00619	unknown
CNAG_03754		186.m03674	short-chain dehydrogenase/reductase SDR	3.00619	unknown
CNAG_03821		186.m03746	phosphatidylinositol 3-kinase	3.00619	unknown
CNAG_03924		186.m03852	nit protein 1	3.00619	unknown
CNAG_03925		186.m04075	peptidase	3.00619	unknown
CNAG_03961		186.m03885	conserved hypothetical protein	3.00619	unknown
CNAG_04024		186.m03950	sugar transporter	3.00619	unknown
CNAG_04139		162.m02281	conserved hypothetical protein	3.00619	unknown
CNAG_04290		162.m02833	conserved hypothetical protein	3.00619	unknown
CNAG_04383		162.m02716	acetyltransferase	3.00619	unknown
CNAG_04384		162.m02725	aminoacyl-tRNA hydrolase	3.00619	unknown
CNAG_04615		185.m02399	L-aminoadipate-semialdehyde dehydrogenase	3.00619	unknown
CNAG_04679		185.m02458	conserved hypothetical protein	3.00619	unknown
CNAG_04682		174_2.seq.179	DNA replication complex GINS protein PSF3	3.00619	unknown
CNAG_05008		173_2.seq.038	hypothetical protein	3.00619	unknown
CNAG_05099		184.m04845	conserved hypothetical protein	3.00619	unknown
CNAG_05125		184.m05222	diphosphomevalonate decarboxylase	3.00619	unknown
CNAG_05187		184.m04769	conserved hypothetical protein	3.00619	unknown
CNAG_05219		184.m04740	conserved hypothetical protein	3.00619	unknown
CNAG_05228		184.m04732	conserved hypothetical protein	3.00619	unknown
CNAG_05372		184.m04362	B2-aldehyde-forming enzyme	3.00619	unknown
CNAG_05515		184.m05085	conserved hypothetical protein	3.00619	unknown
CNAG_05527		184.m04505	helicase sen1	3.00619	unknown
CNAG_05528		174_2.seq.023	conserved hypothetical protein	3.00619	unknown
CNAG_05614		184.m04592	UPF0135 protein	3.00619	unknown
CNAG_05674		180.m00134	Sly41p	3.00619	unknown
CNAG_05690		180.m00401	histone deacetylase 2	3.00619	unknown
CNAG_05782		180.m00341	histone acetylase complex subunit	3.00619	unknown
CNAG_05826		180.m00316	translation release factor	3.00619	unknown
CNAG_05859		180.m00056	conserved hypothetical protein	3.00619	unknown
CNAG_05889		180.m00042	SH3YL1 protein	3.00619	unknown
CNAG_05898		180.m00040	siroheme biosynthesis protein MET8	3.00619	unknown
CNAG_05899		180.m00039	pyrroline-5-carboxylate reductase	3.00619	unknown
CNAG_06029		164.m01996	conserved hypothetical protein	3.00619	unknown
CNAG_06061		164.m02058	eukaryotic translation initiation factor 3 subunit 6	3.00619	unknown
CNAG_06204		164.m02158	high-affinity nicotinic acid transporter	3.00619	unknown
CNAG_06273		183.m01591	Rrs1 protein	3.00619	unknown
CNAG_06362		183.m01661	conserved hypothetical protein	3.00619	unknown
CNAG_06491		183.m01911	conserved hypothetical protein	3.00619	unknown
CNAG_06556		180.m00224	oxidoreductase	3.00619	unknown
CNAG_06631		180.m00179	myosin heavy chain	3.00619	unknown
CNAG_06761		186.m03451	siderophore-iron transporter Str1	3.00619	unknown
CNAG_06762	GAT204	186.m03449	conserved hypothetical protein	3.00619	none	Chun et al, 2011
CNAG_06865		167_3.seq.172	conserved hypothetical protein	3.00619	unknown
CNAG_06891		176.m02174	conserved hypothetical protein	3.00619	unknown
CNAG_06919		176.m02147	methyltransferase	3.00619	unknown
CNAG_06924		176.m02143	beta-fructofuranosidase	3.00619	unknown
CNAG_07325		181.m08731	conserved hypothetical protein	3.00619	unknown
CNAG_07374		181.m08350	conserved hypothetical protein	3.00619	unknown
CNAG_07506		179.m00726	RING finger protein	3.00619	unknown
CNAG_07538		176.m02272	calcium ion transporter	3.00619	unknown
CNAG_00023		181.m07803	conserved hypothetical protein	4.88104	unknown
CNAG_00026		181.m07806	aminotransferase	4.88104	unknown
CNAG_00038		181.m07814	alcohol dehydrogenase	4.88104	unknown
CNAG_00101		181.m07870	conserved hypothetical protein	4.88104	unknown
CNAG_00235		181.m07990	ammonium transporter MEP1	4.88104	unknown
CNAG_00310		170_2.seq.113	conserved hypothetical protein	4.88104	unknown
CNAG_00348		181.m08108	conserved hypothetical protein	4.88104	unknown
CNAG_00391		170_3.seq.010	conserved hypothetical protein	4.88104	unknown
CNAG_00447		181.m08186	t-complex protein 1	4.88104	unknown
CNAG_00467		181.m08202	conserved hypothetical protein	4.88104	unknown
CNAG_00603		181.m08804	pre-rRNA-processing protein PNO1	4.88104	unknown
CNAG_00796		181.m08516	multidrug resistance protein 1	4.88104	unknown
CNAG_00818		181.m08537	AGD15	4.88104	unknown
CNAG_00837		181.m08557	conserved hypothetical protein	4.88104	unknown
CNAG_00839		181.m08559	mitochondrial protein	4.88104	unknown
CNAG_00864		163.m03767	myo-inositol transporter	4.88104	unknown
CNAG_00869		163.m03772	ATP-binding cassette transporter	4.88104	unknown
CNAG_01024		163.m02872	conserved hypothetical protein	4.88104	unknown
CNAG_01059		163.m06176	vacuolar membrane protein	4.88104	unknown
CNAG_01064		163.m06108	conserved hypothetical protein	4.88104	unknown
CNAG_01143		163.m06207	conserved hypothetical protein	4.88104	unknown
CNAG_01148		163.m02744	peptidyl prolyl cis-trans isomerase	4.88104	unknown
CNAG_01150		163.m06204	delta-12 fatty acid desaturase	4.88104	unknown
CNAG_01166		163.m02724	conserved hypothetical protein	4.88104	unknown
CNAG_01189		163.m06272	RNA polymerase I largest subunit	4.88104	unknown
CNAG_01264		163.m06462	isocitrate dehydrogenase	4.88104	unknown
CNAG_01399		163.m06219	conserved hypothetical protein	4.88104	unknown
CNAG_01432		163.m06305	WD repeat protein	4.88104	unknown
CNAG_01446		163.m06340	hypothetical protein	4.88104	unknown
CNAG_01521		166_4.seq.168	metallo-beta-lactamase superfamily protein	4.88104	unknown
CNAG_01540		179.m00554	dehydrogenase	4.88104	unknown
CNAG_01561		179.m00537	WD domain-containing protein	4.88104	unknown
CNAG_01570		166_1.seq.089	predicted protein	4.88104	unknown
CNAG_01629		179.m00130	conserved hypothetical protein	4.88104	unknown
CNAG_01630		179.m00131	polyadenylation factor subunit 2	4.88104	unknown
CNAG_01665		179.m00161	conserved hypothetical protein	4.88104	unknown
CNAG_01736		166_2.seq.067	predicted protein	4.88104	unknown
CNAG_01811		179.m00269	conserved hypothetical protein	4.88104	unknown
CNAG_01813		179.m00271	mannose-1-phosphate guanylyltransferase	4.88104	unknown
CNAG_01860		176.m02338	ornithine cyclodeaminase	4.88104	unknown
CNAG_01905		176.m02381	serine/threonine protein kinase	4.88104	unknown
CNAG_01979		176.m02570	conserved hypothetical protein	4.88104	unknown
CNAG_02071		167.m05833	conserved hypothetical protein	4.88104	unknown
CNAG_02089		167.m03586	conserved hypothetical protein	4.88104	unknown
CNAG_02162		167.m03519	chromosome 14 open reading frame 111	4.88104	unknown
CNAG_02285		167.m03399	nucleoside-diphosphate kinase	4.88104	unknown
CNAG_02304		167.m03381	conserved hypothetical protein	4.88104	unknown
CNAG_02348		167.m05969	conserved hypothetical protein	4.88104	unknown
CNAG_02394		167.m05967	conserved hypothetical protein	4.88104	unknown
CNAG_02533		167.m05766	conserved hypothetical protein	4.88104	unknown
CNAG_02726		179.m00308	cytoplasmic protein	4.88104	unknown
CNAG_02763		179.m00338	phenylalanyl-tRNA synthetase beta chain	4.88104	unknown
CNAG_02920		179.m00456	hydrolase	4.88104	unknown
CNAG_02933		179.m00469	quinone oxidoreductase	4.88104	unknown
CNAG_02953		179.m00723	tuberin	4.88104	unknown
CNAG_03400		177.m03033	oxidoreductase	4.88104	unknown
CNAG_03414		177.m03019	conserved hypothetical protein	4.88104	unknown
CNAG_03416		177.m03018	conserved hypothetical protein	4.88104	unknown
CNAG_03436		177.m02998	transaminase	4.88104	unknown
CNAG_03483		177.m02959	coiled-coil protein	4.88104	unknown
CNAG_03488		177.m02954	conserved hypothetical protein	4.88104	unknown
CNAG_03551		177_1.seq.051	predicted protein	4.88104	unknown
CNAG_03599		186.m03520	mandelate racemase/muconate lactonizing enzyme	4.88104	unknown
CNAG_03623		186.m03546	short-chain dehydrogenase	4.88104	unknown
CNAG_03640		186.m03562	conserved hypothetical protein	4.88104	unknown
CNAG_03647		186.m03572	conserved hypothetical protein	4.88104	unknown
CNAG_03779		186.m03700	ribosomal protein L4	4.88104	unknown
CNAG_03835		171_2.seq.180	predicted protein	4.88104	unknown
CNAG_03837		186.m03760	protein-L-isoaspartate O-methyltransferase	4.88104	unknown
CNAG_03874		186.m03806	oxidoreductase	4.88104	unknown
CNAG_03875		186.m03807	UTP-hexose-1-phosphate uridylyltransferase	4.88104	unknown
CNAG_04054		186.m03982	Sui1 protein	4.88104	unknown
CNAG_04260		162.m02943	translation initiation factor	4.88104	unknown
CNAG_04320		162.m02779	polysaccharide synthase Cps1p	4.88104	unknown
CNAG_04373		162.m02719	alginate lyase	4.88104	unknown
CNAG_04475		162.m04518	conserved hypothetical protein	4.88104	unknown
CNAG_04574		185.m02357	conserved hypothetical protein	4.88104	unknown
CNAG_04638		185.m02423	conserved hypothetical protein	4.88104	unknown
CNAG_04776		185.m02548	homoserine dehydrogenase Hom6	4.88104	unknown
CNAG_04800		185.m02573	phenylalanine-tRNA ligase	4.88104	unknown
CNAG_04926		164.m02198	conserved hypothetical protein	4.88104	unknown
CNAG_04947		184.m05037	high-affinity nicotinic acid transporter	4.88104	unknown
CNAG_05120		184.m04825	nicotinate phosphoribosyltransferase	4.88104	unknown
CNAG_05298		174_1.seq.042	conserved hypothetical protein	4.88104	unknown
CNAG_05317		184.m04649	phytanoyl-CoA dioxygenase family protein	4.88104	unknown
CNAG_05425		184.m04412	asparagine synthase	4.88104	unknown
CNAG_05573		184.m04552	conserved hypothetical protein	4.88104	unknown
CNAG_05727		180.m00112	conserved hypothetical protein	4.88104	unknown
CNAG_05805		180.m00083	conserved hypothetical protein	4.88104	unknown
CNAG_06027		164.m01998	aryl-alcohol dehydrogenase	4.88104	unknown
CNAG_06034		164.m02792	allantoin permease	4.88104	unknown
CNAG_06122		164.m02133	glycerol-1-phosphatase	4.88104	unknown
CNAG_06351		183.m01652	conserved hypothetical protein	4.88104	unknown
CNAG_06386		183.m01877	conserved hypothetical protein	4.88104	unknown
CNAG_06417		183.m01883	clathrin coat assembly protein	4.88104	unknown
CNAG_06443		183.m01732	heat shock protein 70	4.88104	unknown
CNAG_06839		163.m06396	phosphatidyl-N-methylethanolamine N-methyltransferase	4.88104	unknown
CNAG_06874		167.m03666	HpcH/HpaI aldolase/citrate lyase family protein	4.88104	unknown
CNAG_06908		176.m02158	pyridoxine biosynthesis protein	4.88104	unknown
CNAG_06912		176.m02157	conserved hypothetical protein	4.88104	unknown
CNAG_06926		176.m02140	conserved hypothetical protein	4.88104	unknown
CNAG_07253		170_2.seq.174	conserved hypothetical protein	4.88104	unknown
CNAG_07473		186.m03611	valine-tRNA ligase	4.88104	unknown
CNAG_07498		166_1.seq.007	DUF567 domain-containing protein	4.88104	unknown
